# Supplementary material for: Management of Weeds in Maize by Sequential or Individual Applications of Pre- and Post-Emergence Herbicides
Source: MDPI journal article supplement (doi:10.3390/agriculture13020421), 2023-02-10

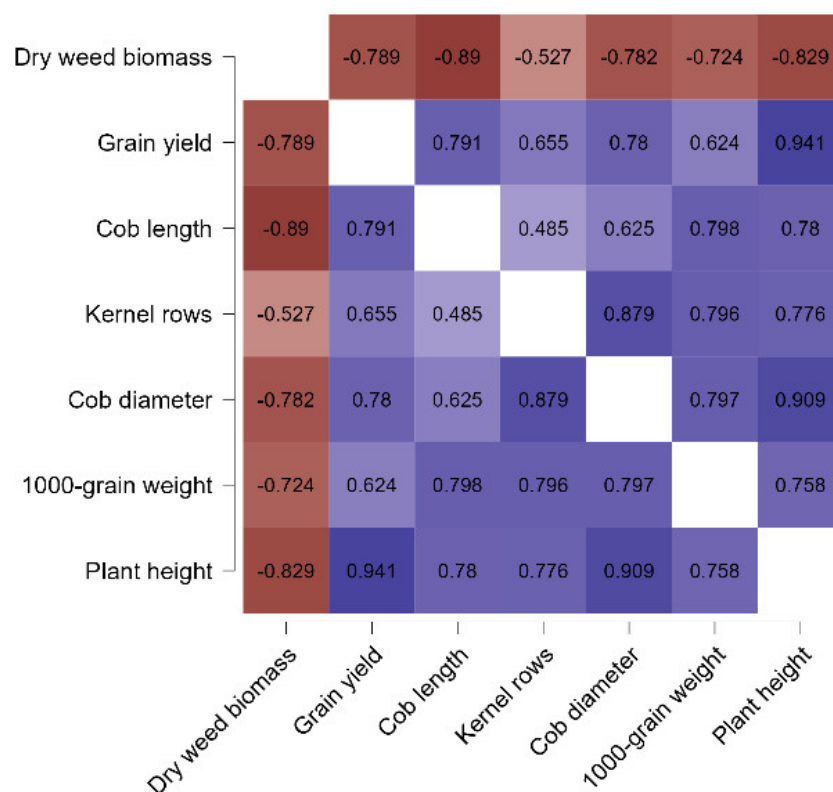

**Figure S1.** Correlation analysis of the estimated parameters for 2019.

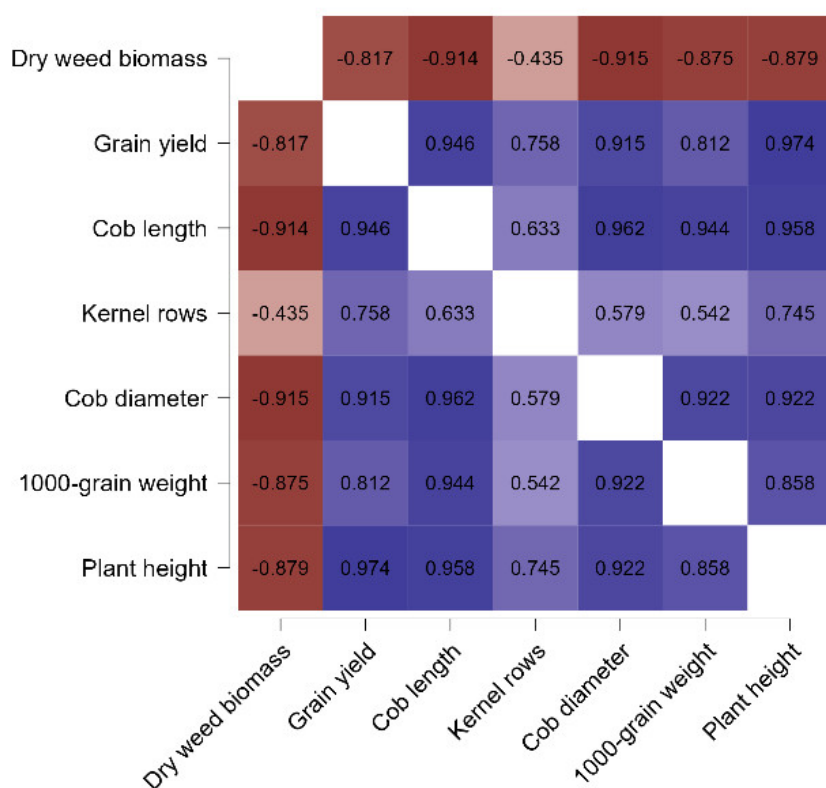

**Figure S2.** Correlation analysis of the estimated parameters for 2020.

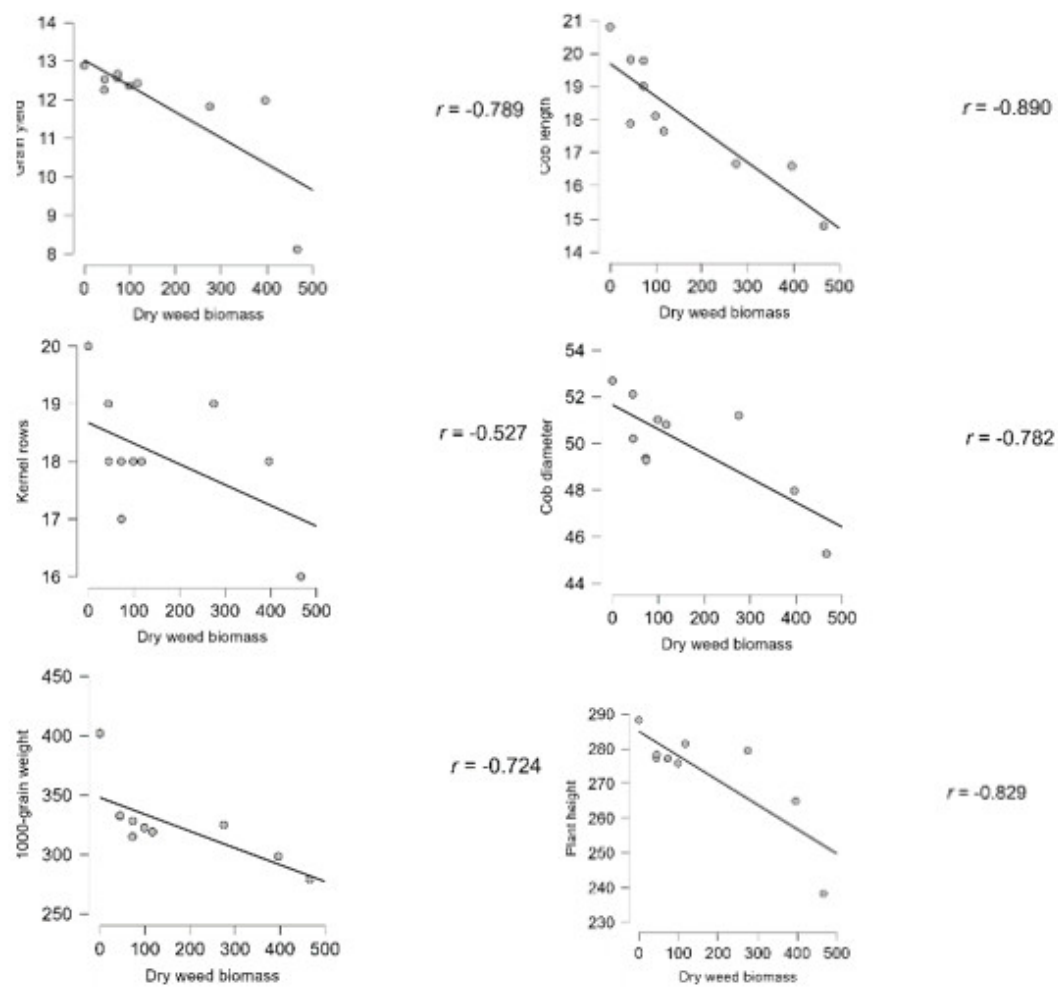

**Figure S3.** Correlation between dry weight and agronomic parameters for 2019.

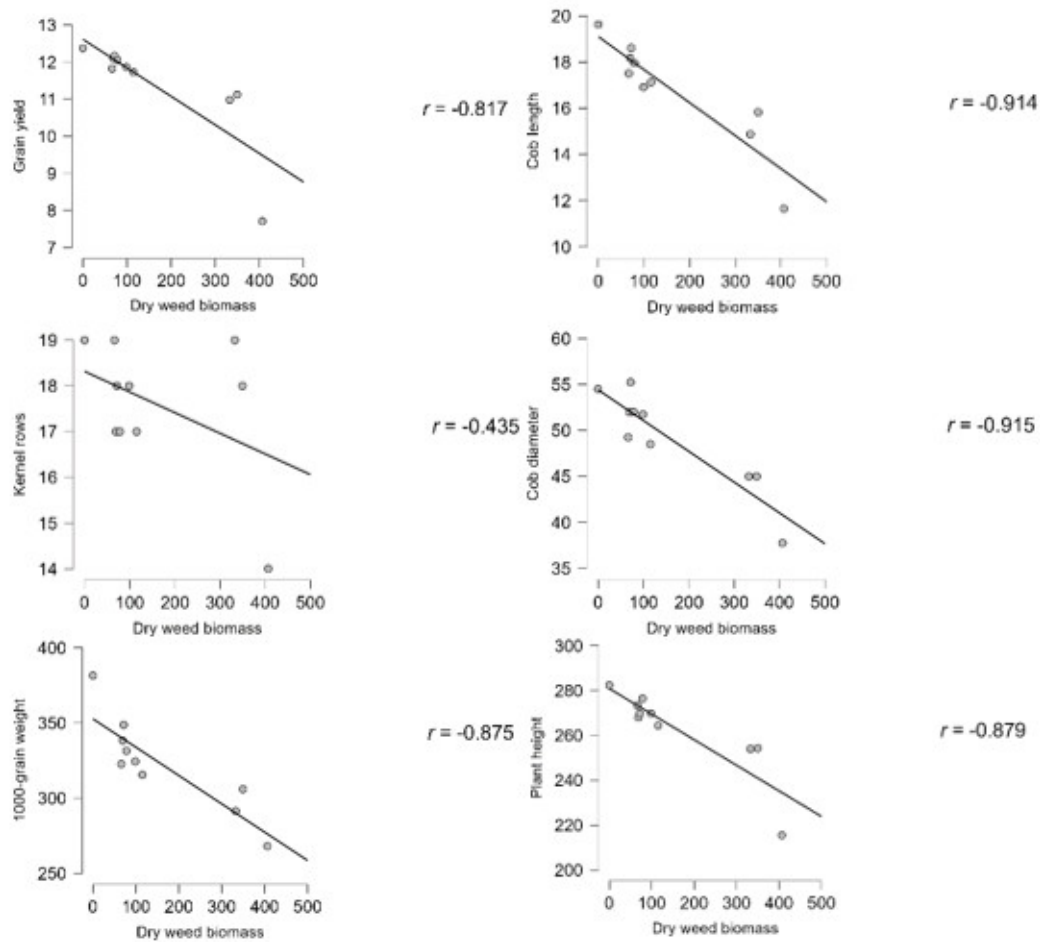

**Figure S4.** Correlation between dry weight and agronomic parameters for 2020.

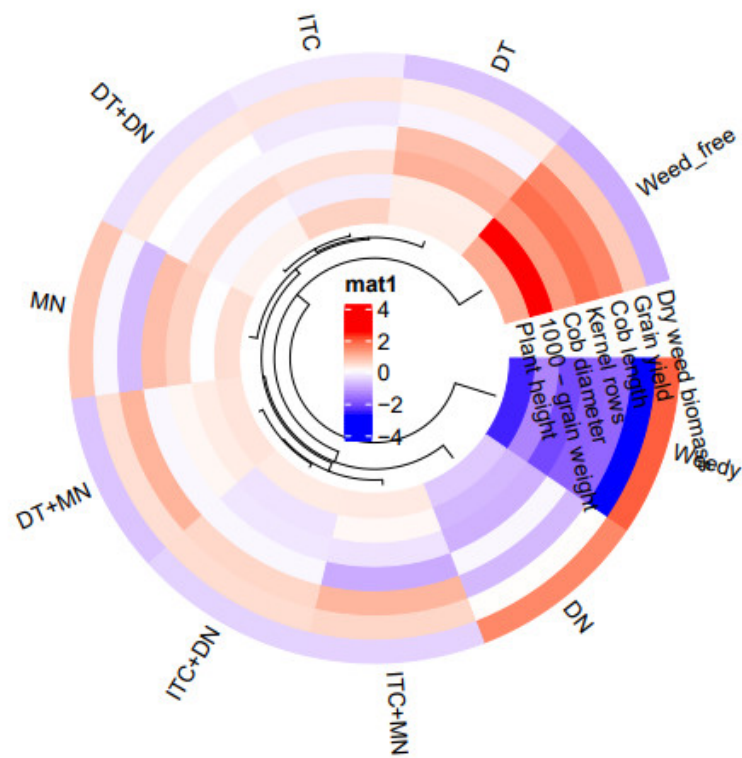

Figure S5. Heat map clustering for 2019.

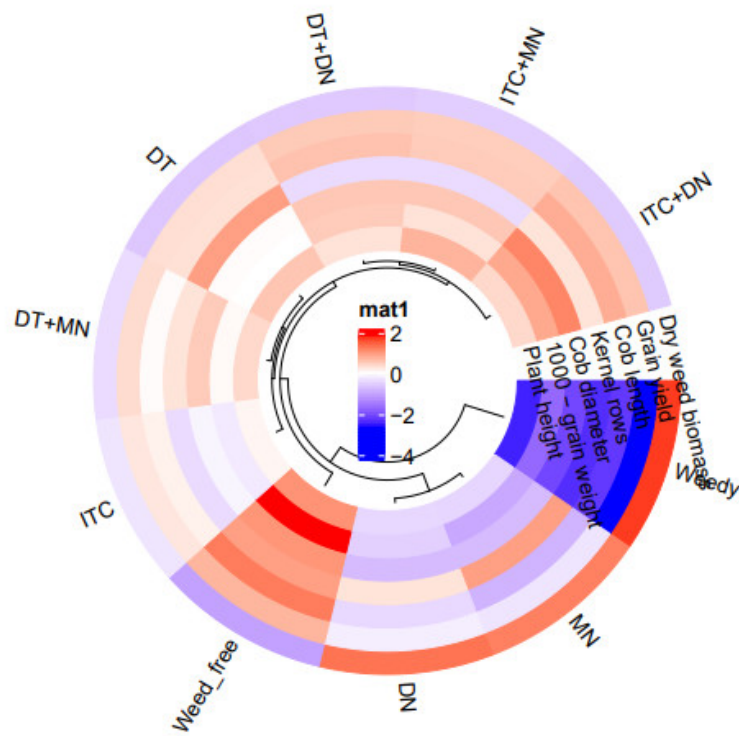

Figure S6. Heat map clustering for 2020.

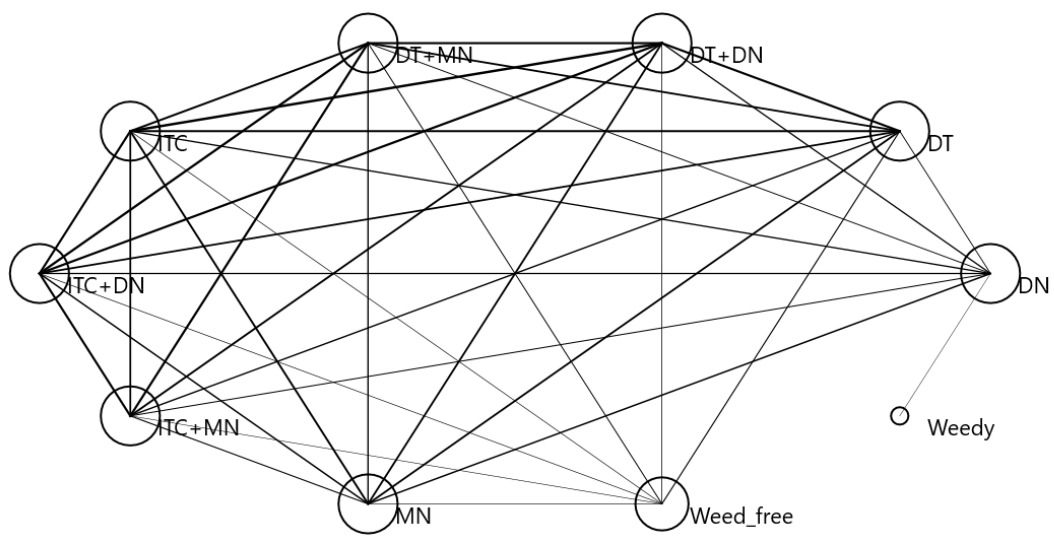

**Figure S7.** Network plot analysis for 2019.

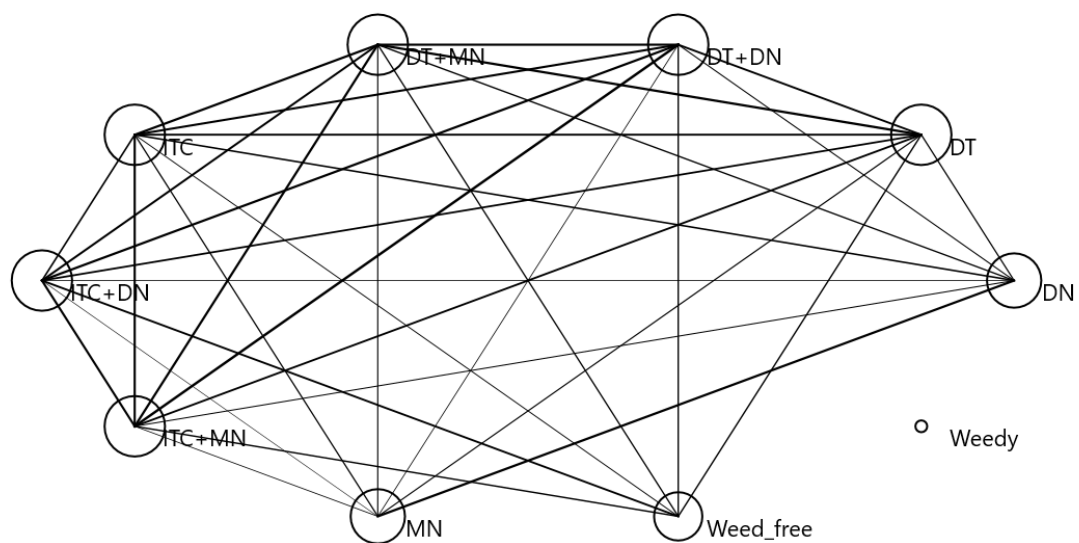

**Figure S8.** Network plot analysis for 2019.

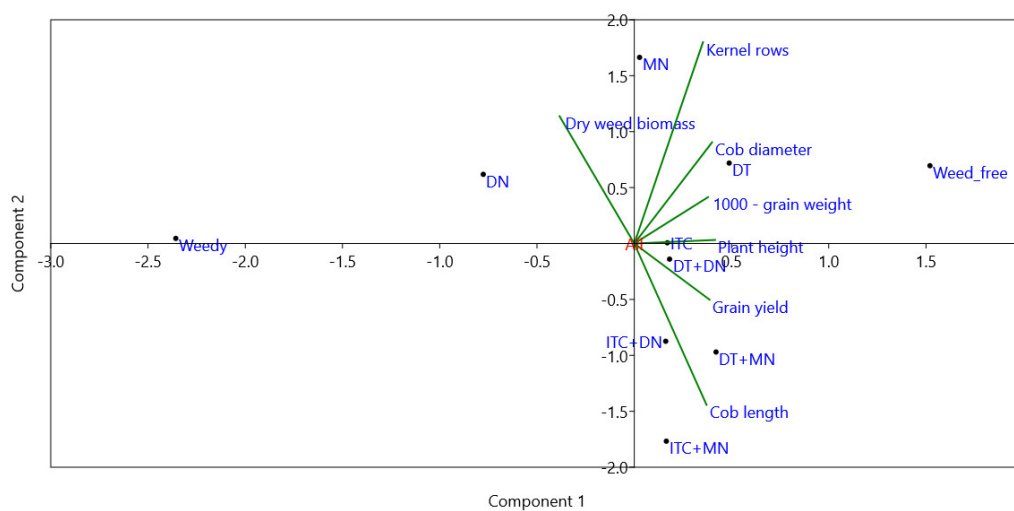

**Figure S9.** Principal component analysis for 2019.

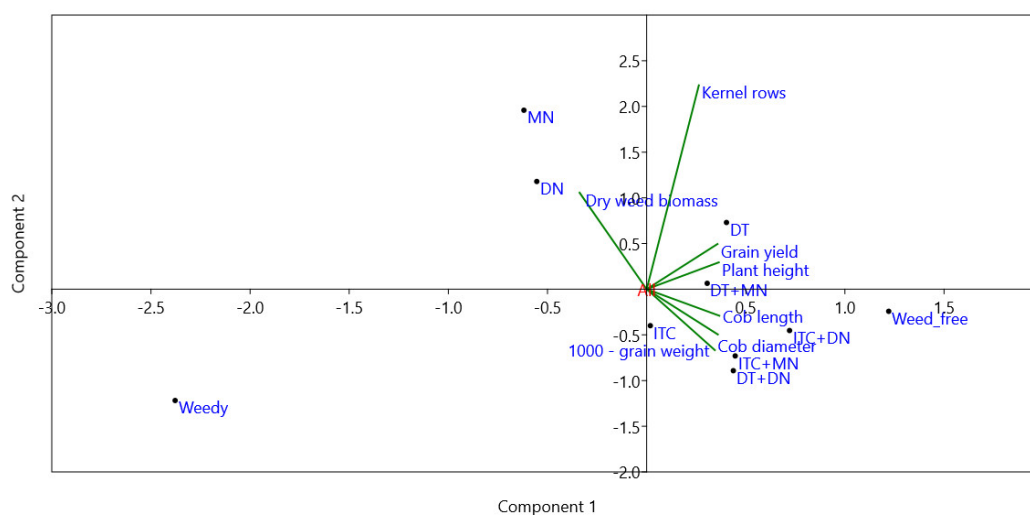

**Figure S10.** Principal component analysis for 2020.



# IMAGES FROM THE EXPERIMENTAL FIELDS

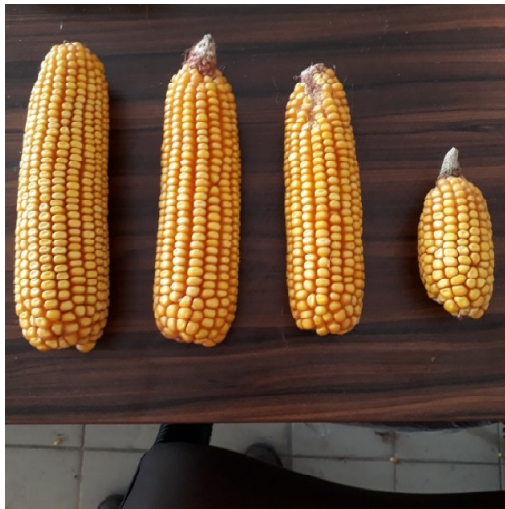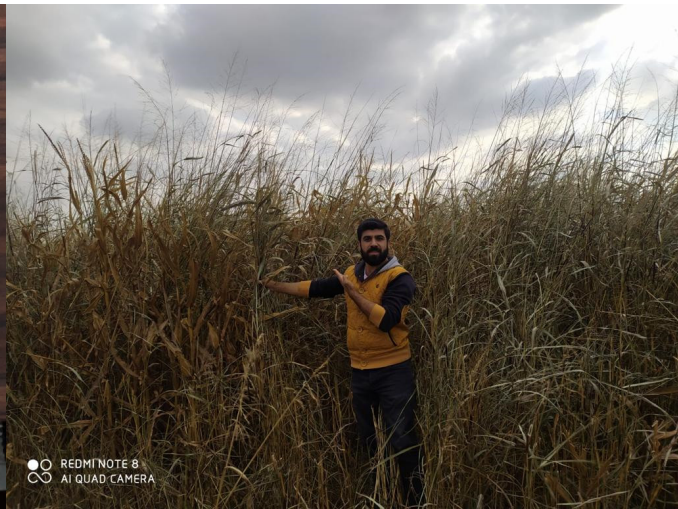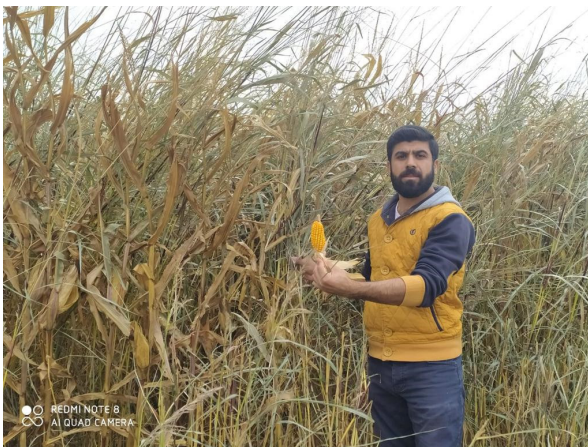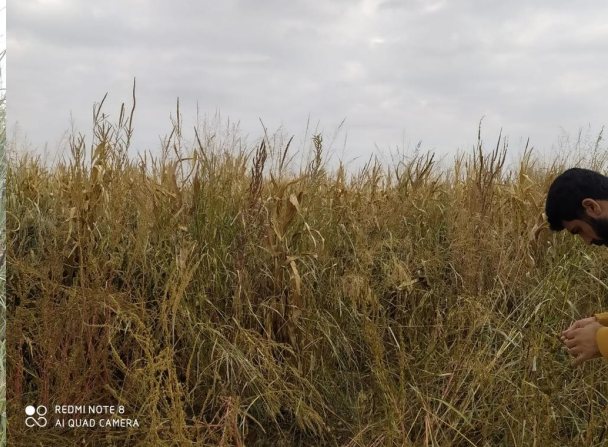



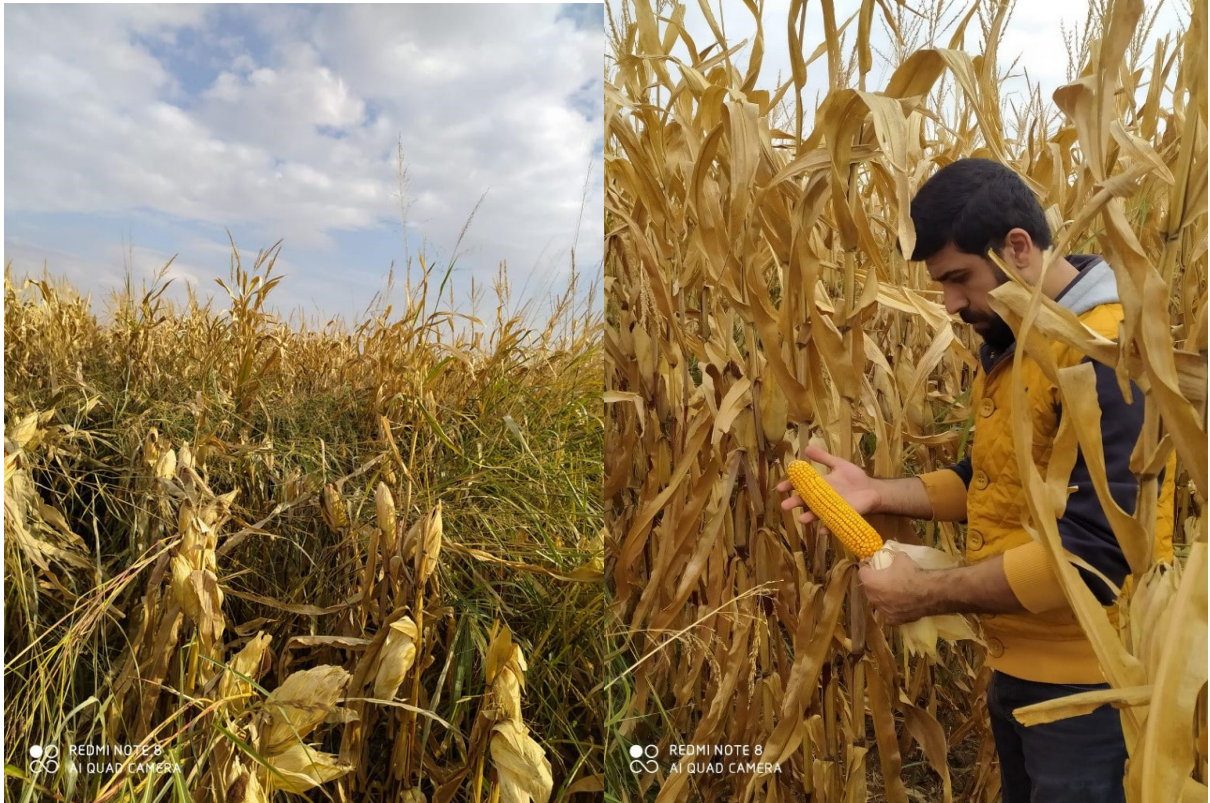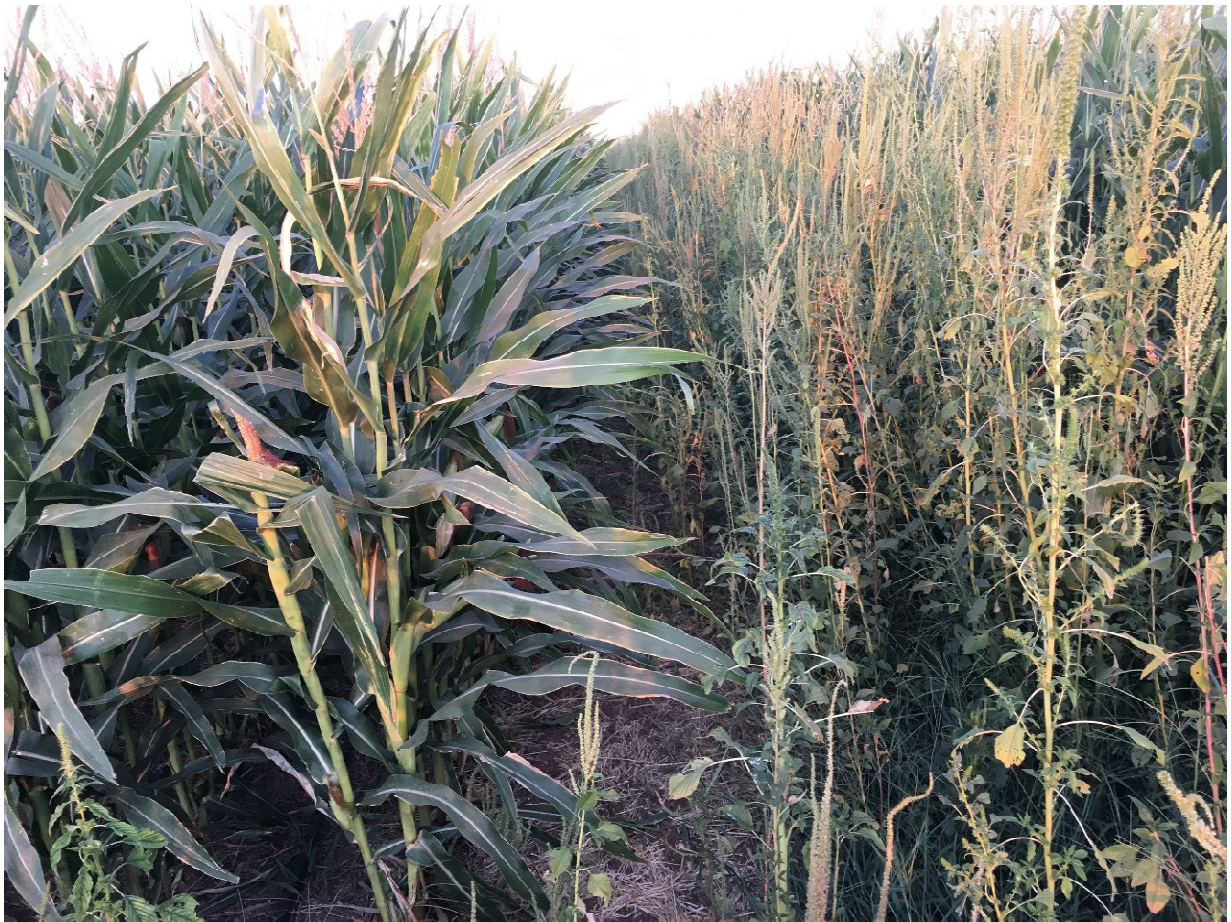



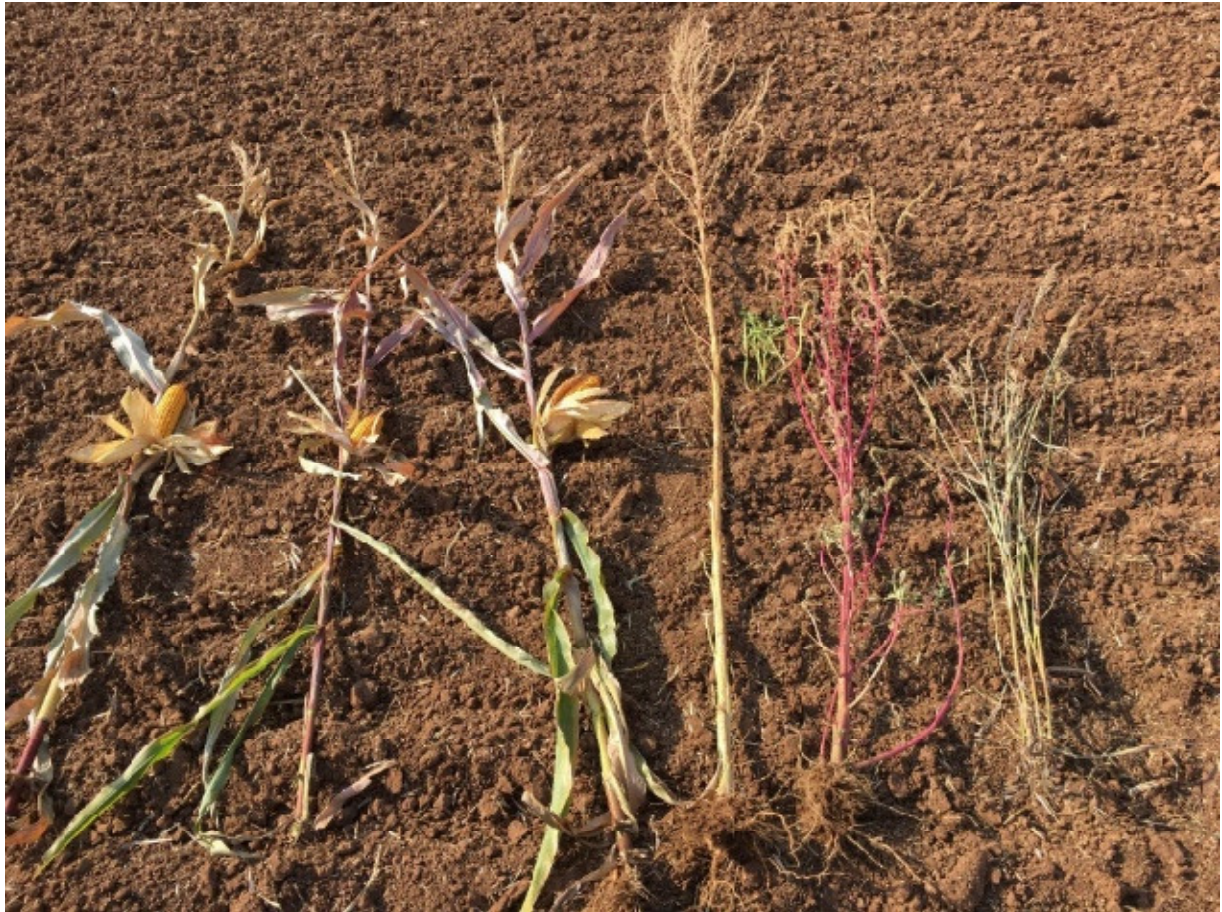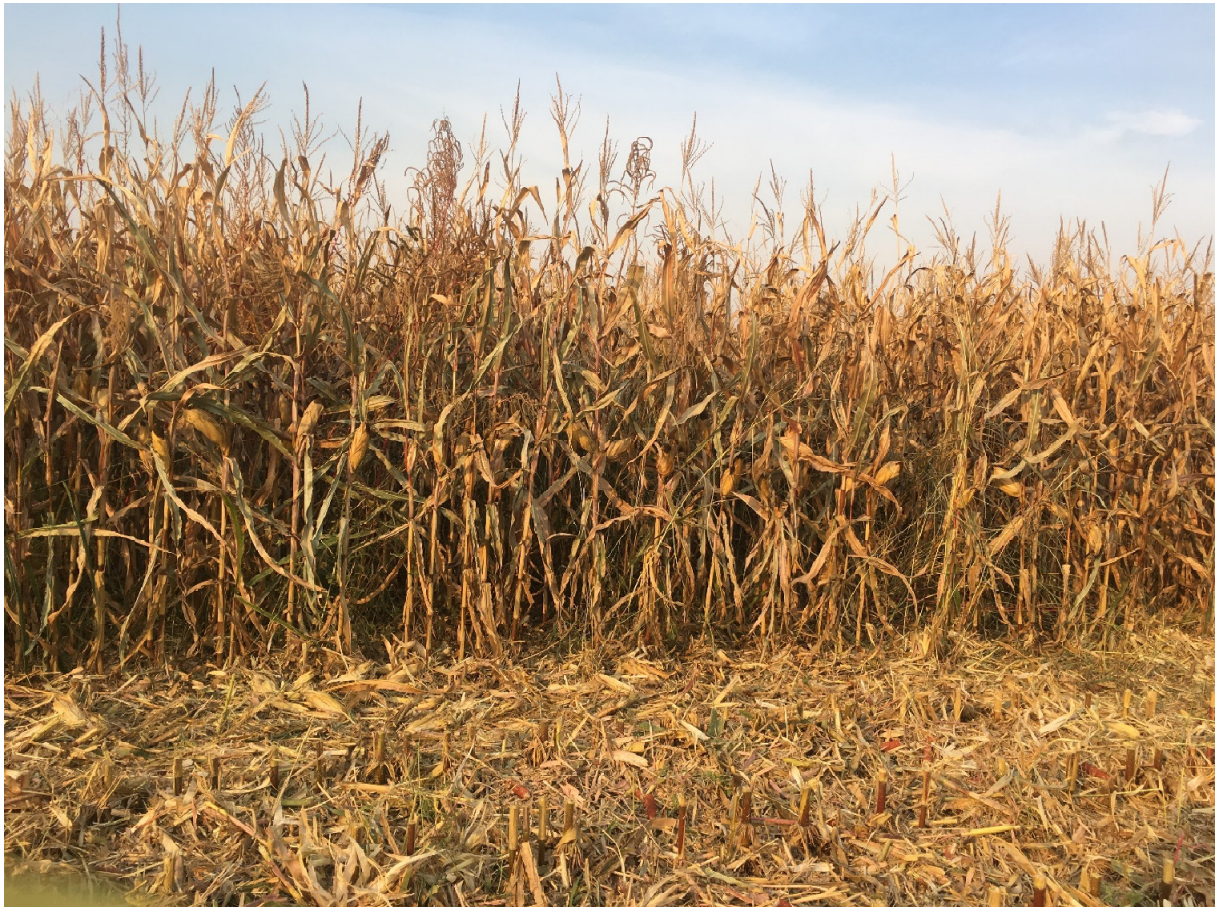



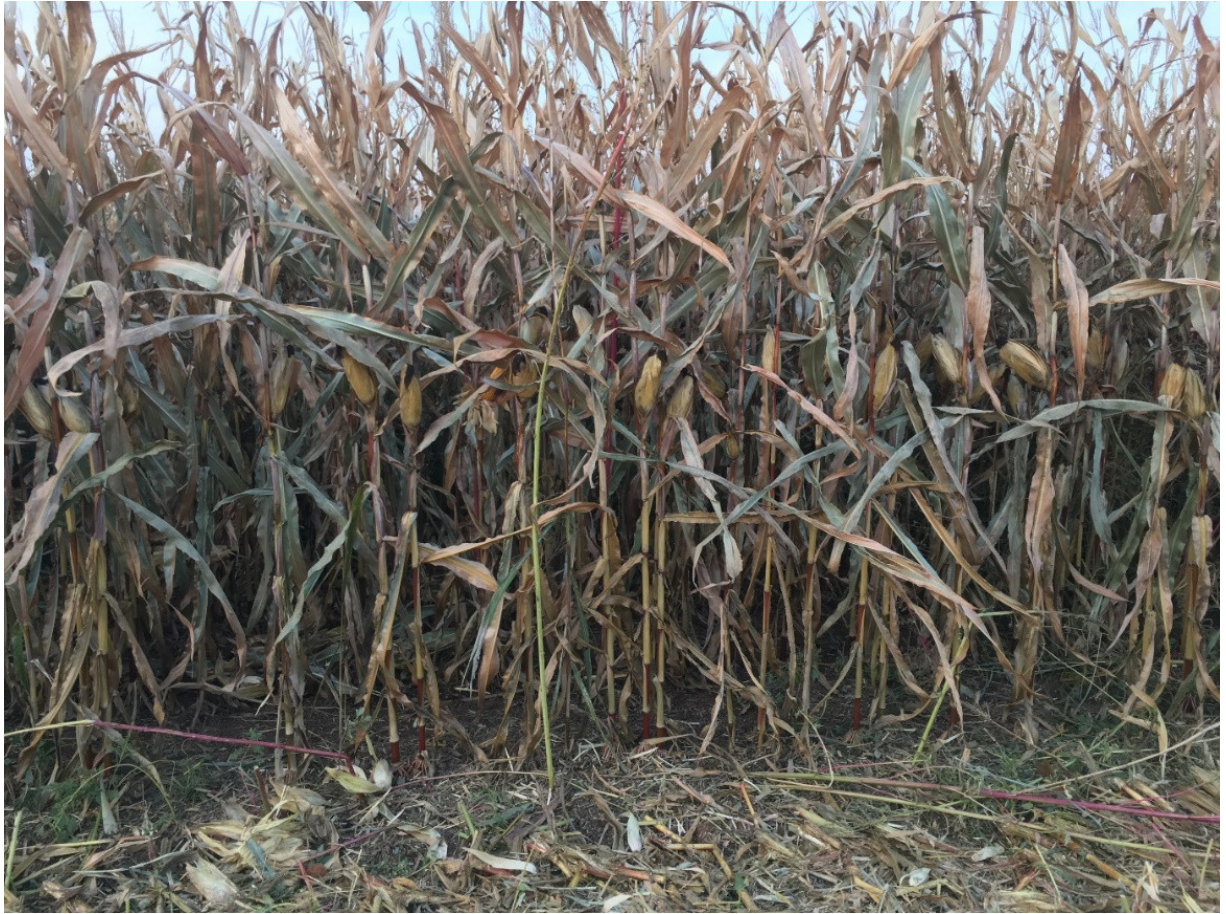

Supplement: s1 [file s1]
