# Supplementary material for: Management of Weeds in Maize by Sequential or Individual Applications of Pre- and Post-Emergence Herbicides
Source: MDPI journal article supplement (doi:10.3390/agriculture13020421), 2023-02-10
Supplement: s1 [file s1]

Archive with 1 entries (1 files):
- agriculture-2180323-supplementary.pdf
